# Supplementary material for: Lead-OR: A multimodal platform for deep brain stimulation surgery
Source: eLife journal article supplement (doi:10.7554/elife.72929), 2022-05-20
Supplement: supp [file elife-72929-supp-v1.zip]

Archive with 16 entries (16 files):
- elife_poa_e72929_Figure_2_video_1.mp4
- elife_poa_e72929_Figure_4_video_1.mp4
- elife_poa_e72929_Figure_4_video_2.mp4
- elife_poa_e72929_Transparent_Reporting_File.pdf
- elife_poa_e72929_Figure_4_source_data_1.zip
- elife_poa_e72929_Figure_5_source_data_1.zip
- elife_poa_e72929_Figure_5_source_data_2.zip
- elife_poa_e72929_Figure_6_source_data_1.zip
- elife_poa_e72929_Figure_5_source_code_1.m
- elife_poa_e72929_Figure_5_source_code_2.m
- elife_poa_e72929_Figure_4_figure_supplement_1.pdf
- elife_poa_e72929_Figure_4_figure_supplement_2.pdf
- elife_poa_e72929_Figure_5_figure_supplement_1.pdf
- elife_poa_e72929_Figure_5_figure_supplement_2.pdf
- elife_poa_e72929_Figure_5_figure_supplement_3.pdf
- elife_poa_e72929_Supplementary_file_1.pdf
