# Supplementary material for: Lead-OR: A multimodal platform for deep brain stimulation surgery
Source: eLife journal article supplement (doi:10.7554/elife.72929), 2022-05-20
Supplement: supp [file elife-72929-supp-v1.zip › elife_poa_e72929_Supplementary_file_1.pdf]

# **Consecutive STN surgeries from 07/2017 to 10/2020**

**N = 91**

**Brainlab planning export  
unavailable: 13**

**Postop. Imaging Missing: 9**

**Incomplete MER labeling: 17**

**Homogeneous data consistent  
with current clinical practice**

**N = 52**

**Imaging with movement  
artifacts and/or low SNR: 4**

**MER with artifacts  
and/or low SNR: 16**

**Good quality data**

**N = 32, 56 hemispheres,  
236 trajectories**
