# Supplementary figures and images for: Lead-OR: A multimodal platform for deep brain stimulation surgery
Source: eLife journal article supplement (doi:10.7554/elife.72929), 2022-05-20

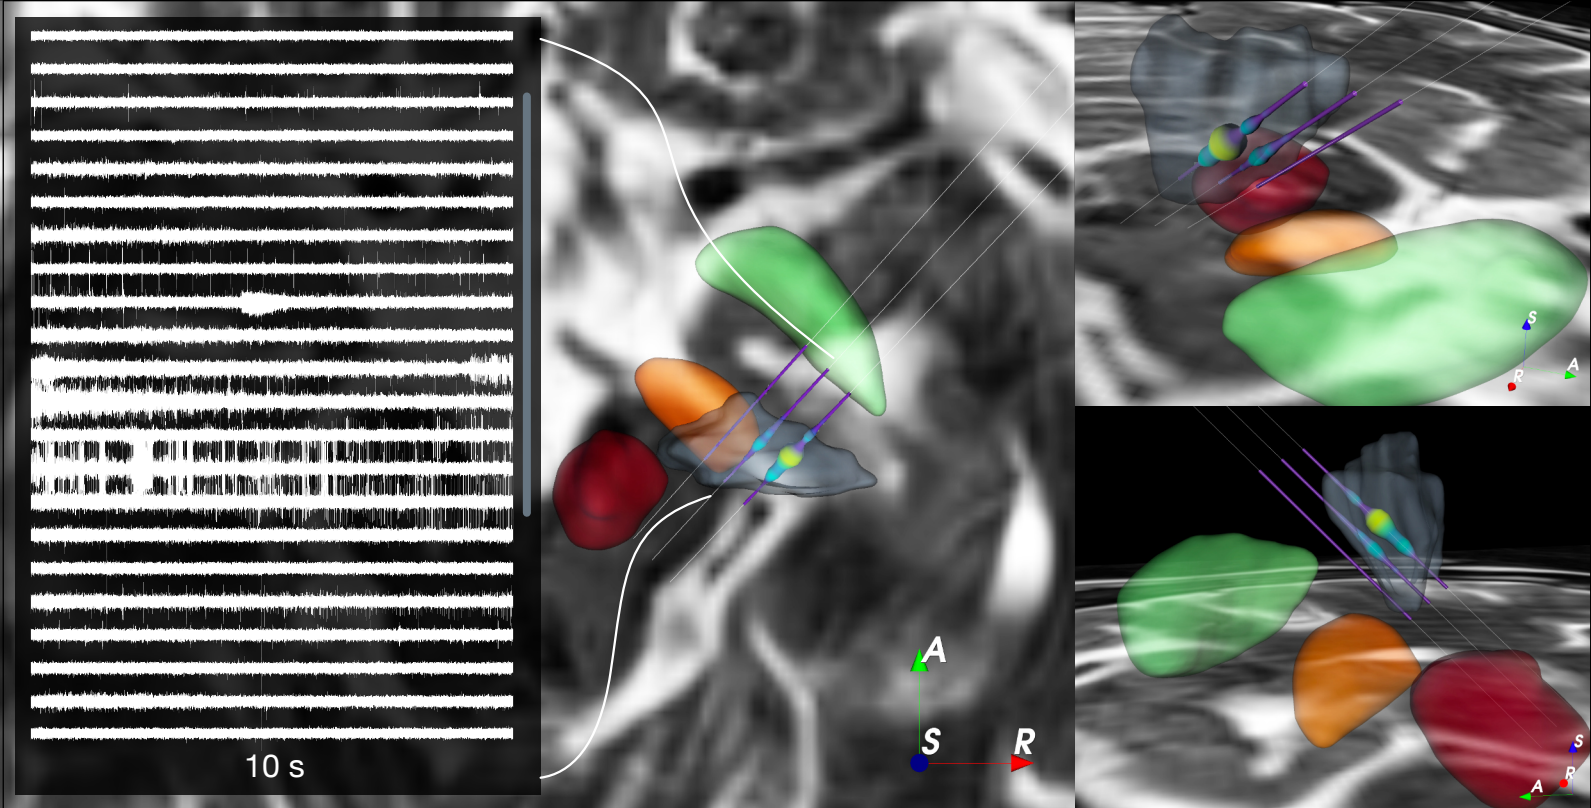

■ GPe (not shown in 3D) ■ GPi ■ STN ■ RN ■ VIM 0 3 NRMS

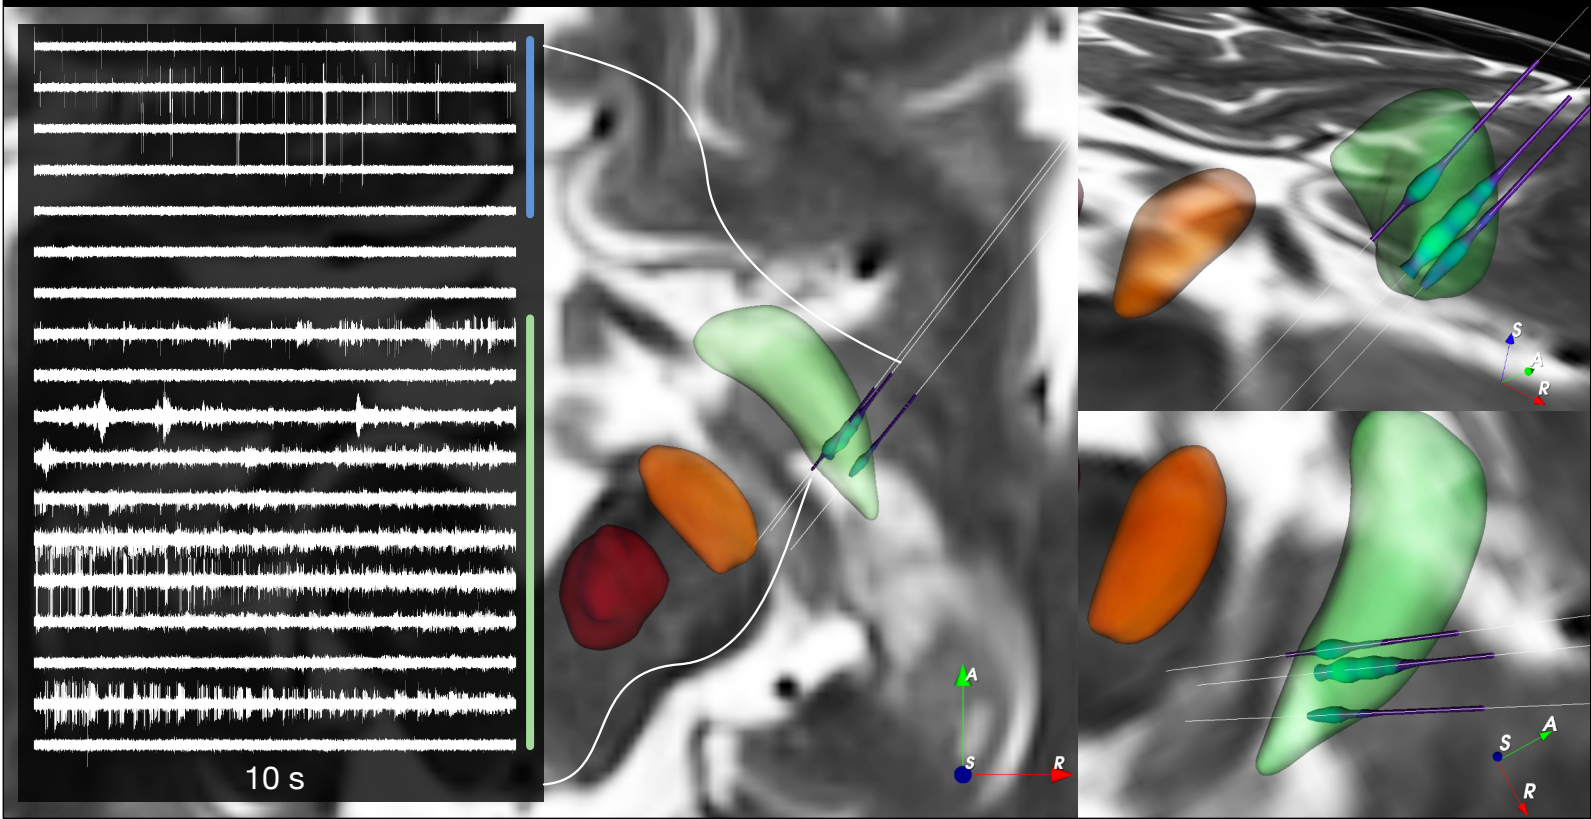

Supplement: supp [file elife-72929-supp-v1.zip › elife_poa_e72929_Figure_4_figure_supplement_1.pdf]

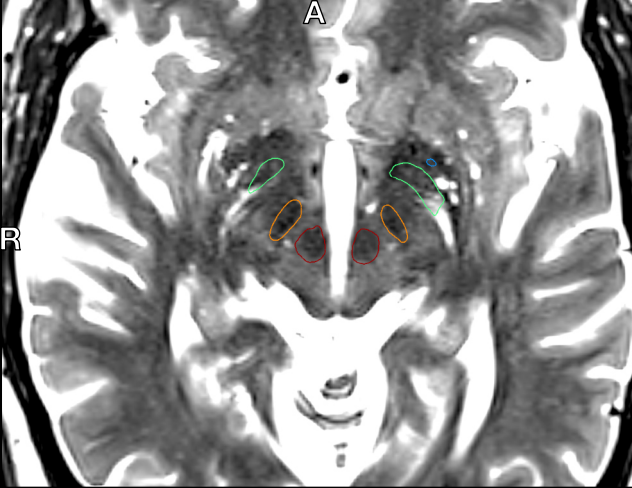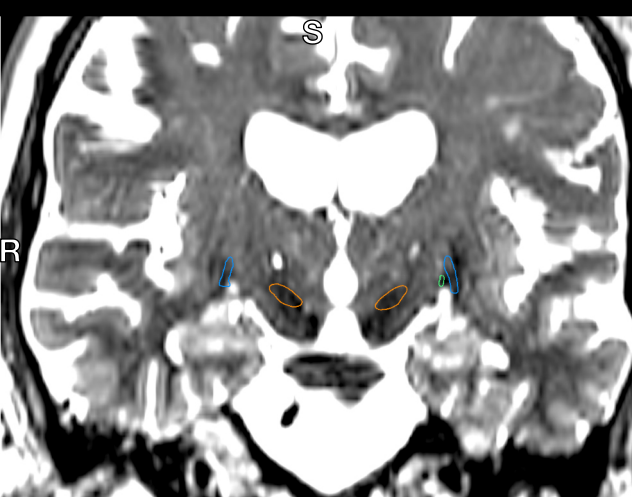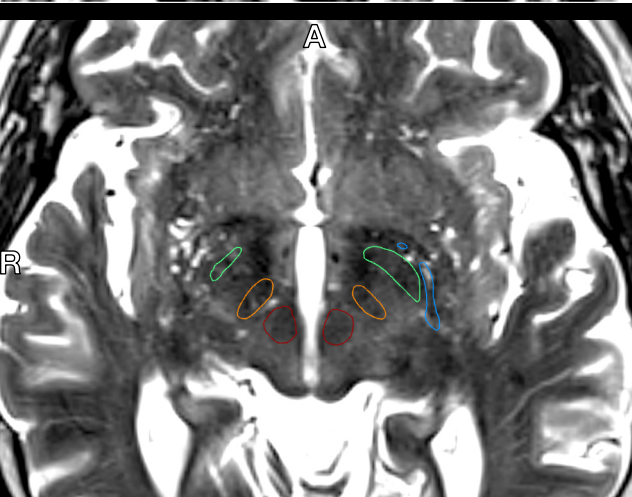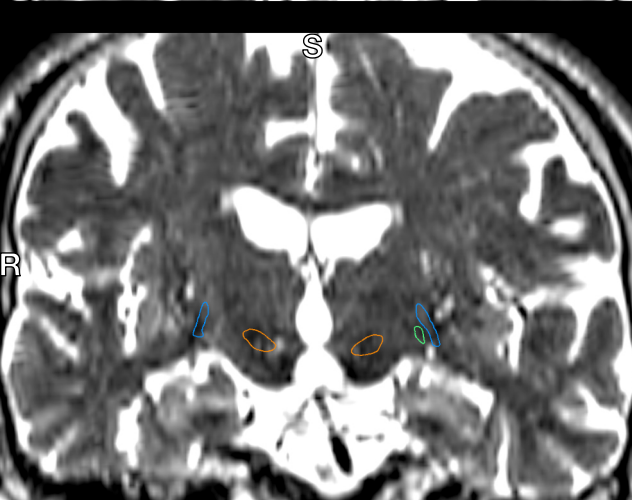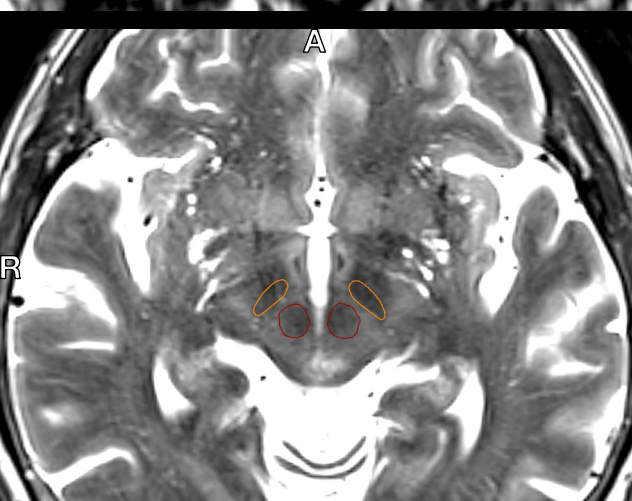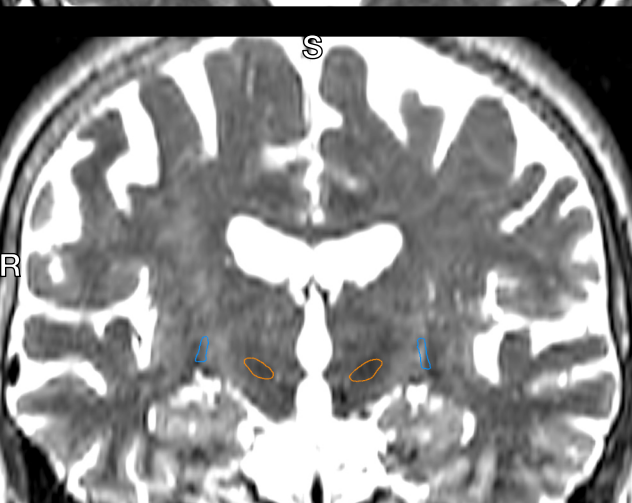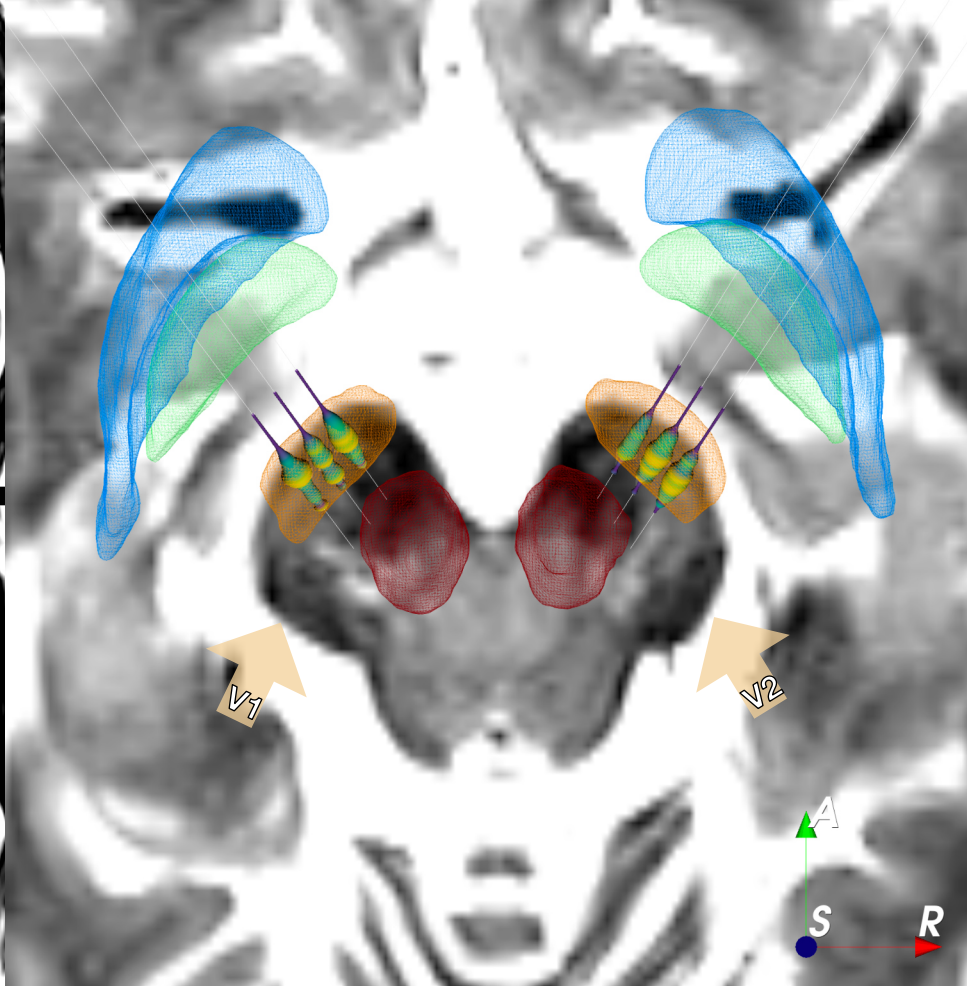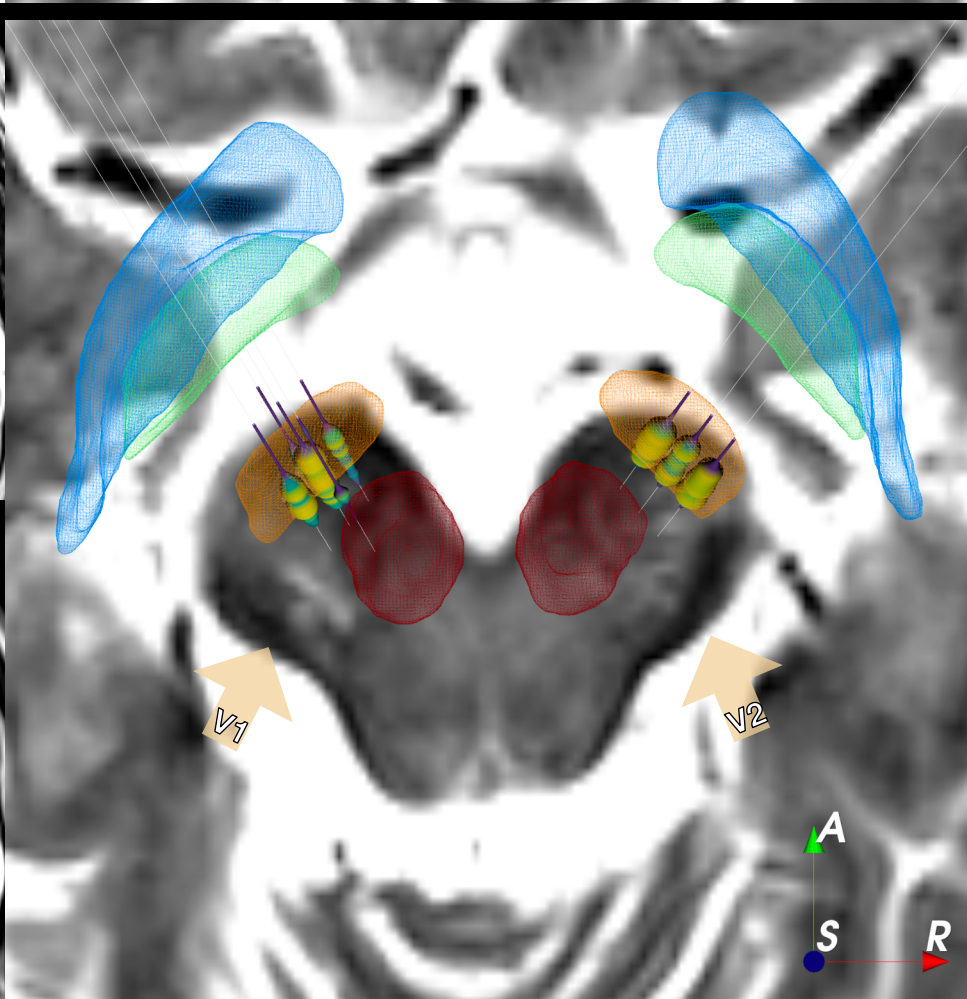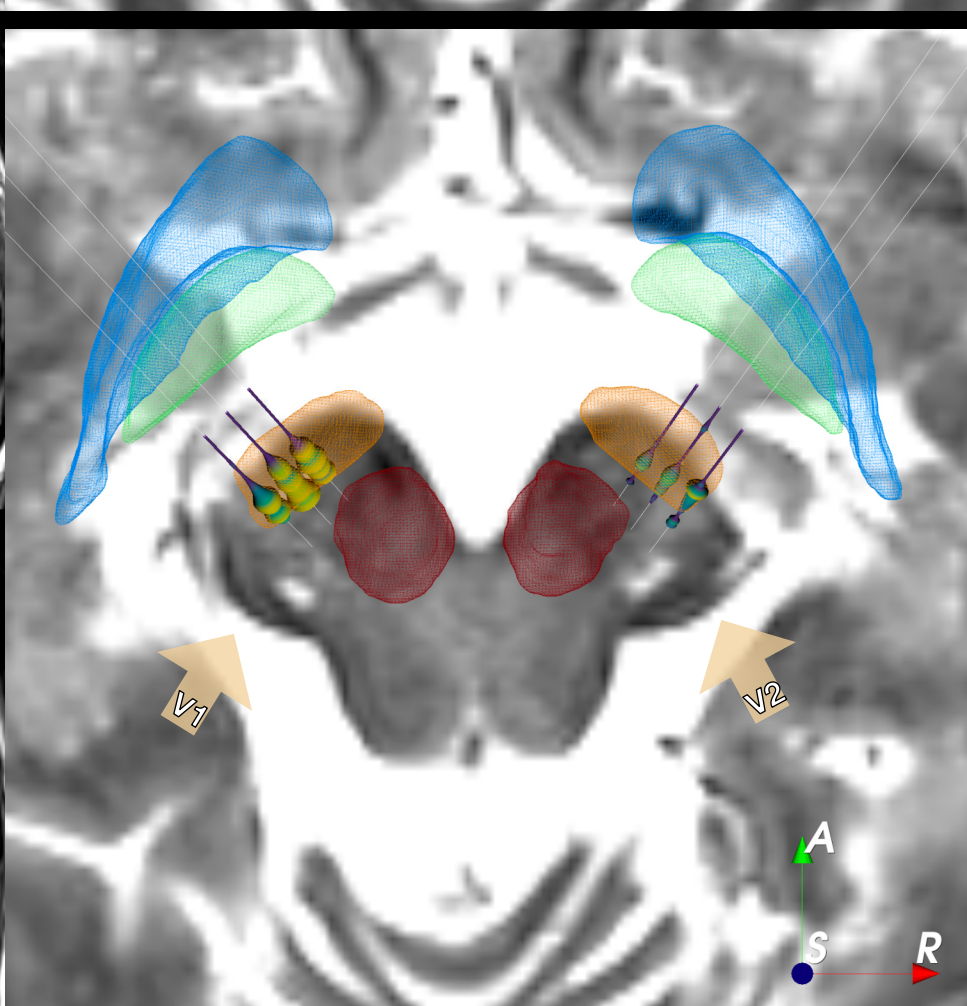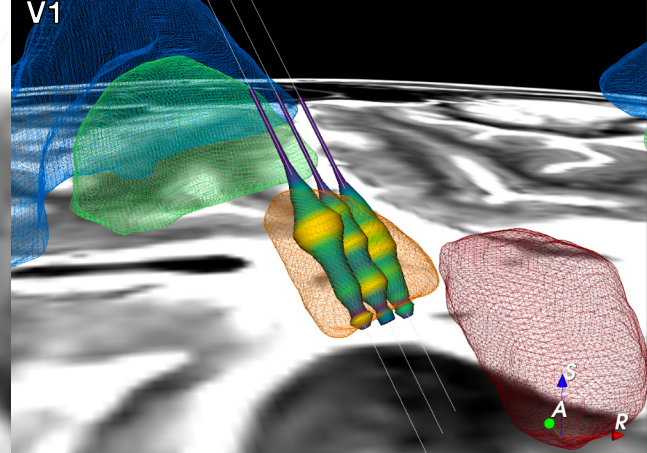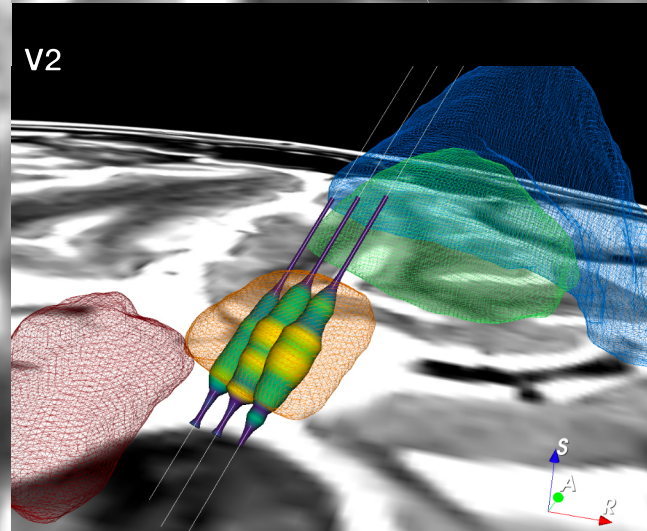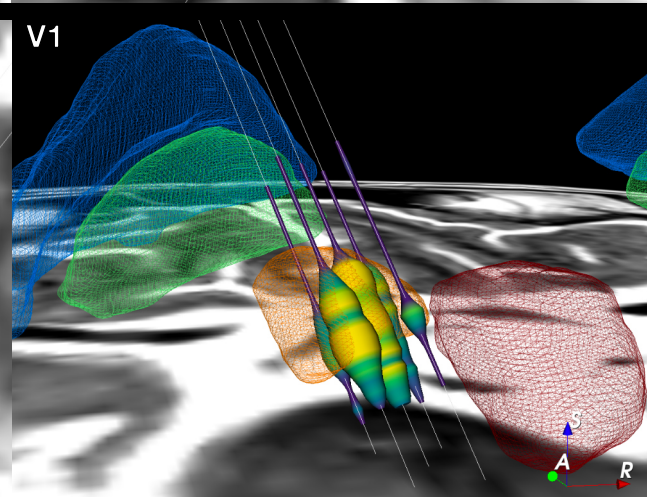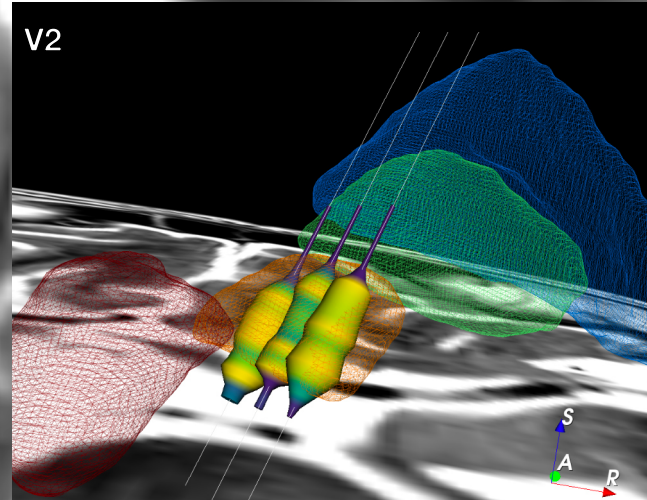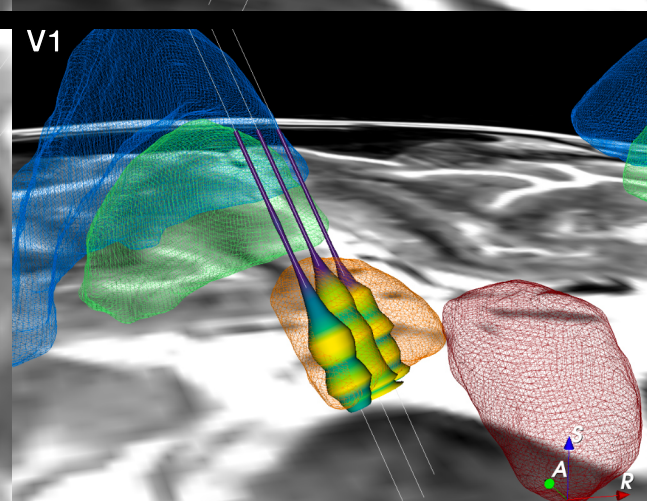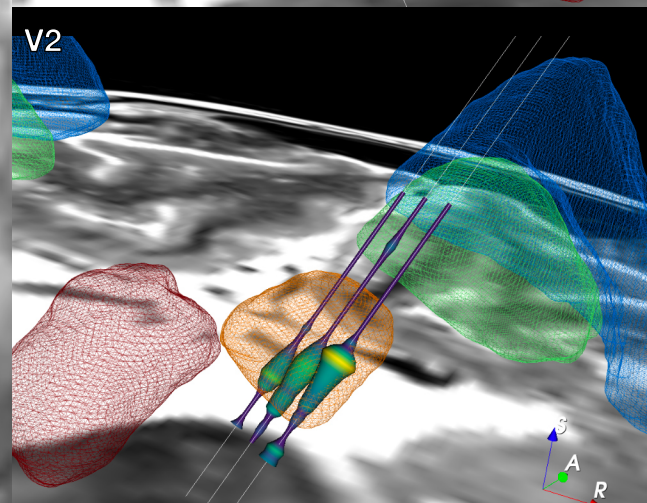

■ GPe ■ GPi ■ STN ■ RN ■ 0 ■ 3 NRMS

Supplement: supp [file elife-72929-supp-v1.zip › elife_poa_e72929_Figure_4_figure_supplement_2.pdf]

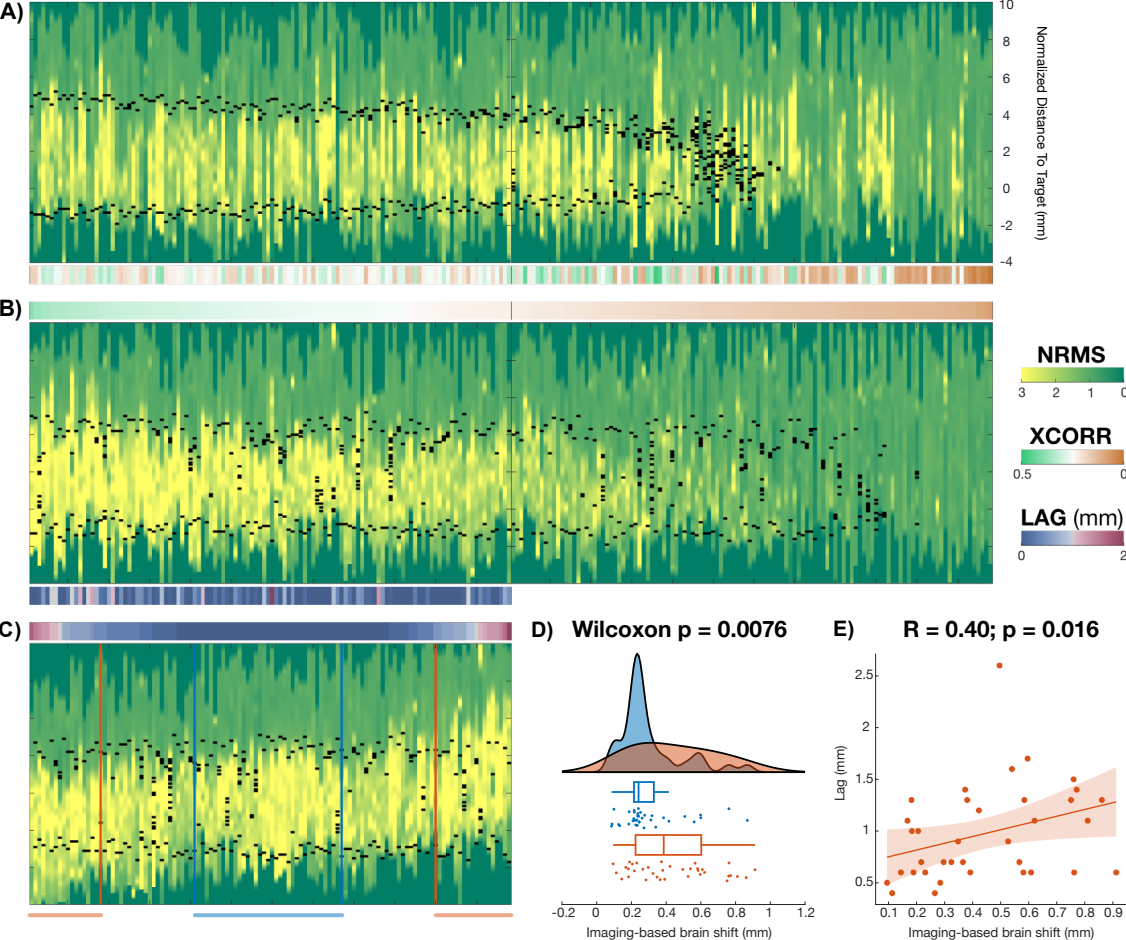

Supplement: supp [file elife-72929-supp-v1.zip › elife_poa_e72929_Figure_5_figure_supplement_1.pdf]

Lead-OR reconstructed trajectories

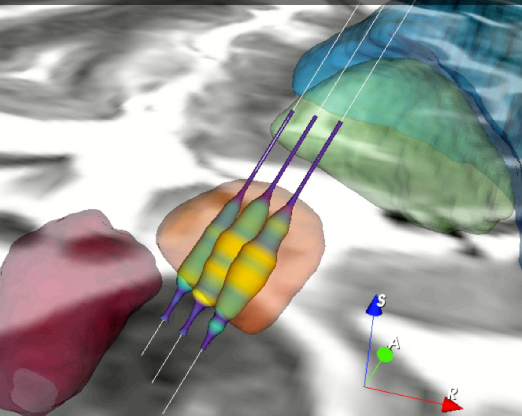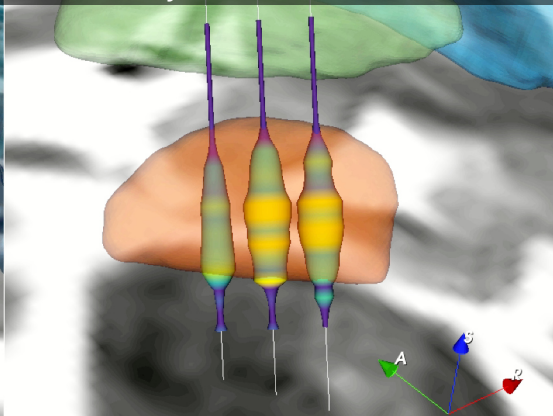

Post-op imaging-based brain shift corrected

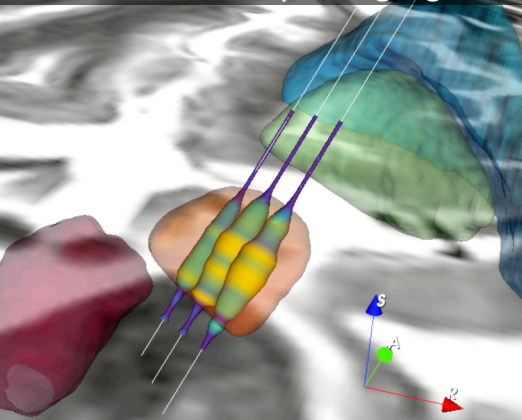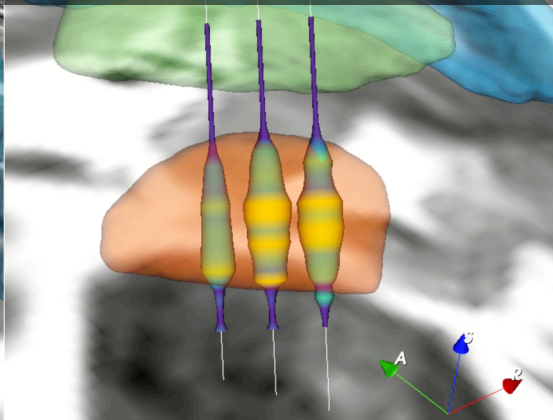

Supplement: supp [file elife-72929-supp-v1.zip › elife_poa_e72929_Figure_5_figure_supplement_2.pdf]

**A****NRMS** 3 2 1 0**Active contact location** ●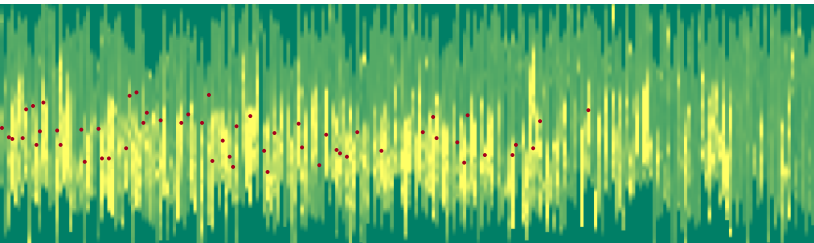Normalized Distance To Target (mm)  
10  
8  
6  
4  
2  
0  
-2  
-4**B**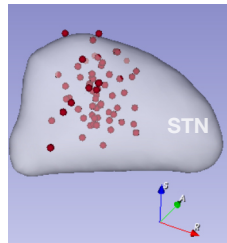**C****Cluster Density**

&gt;10% &gt;35% &gt;50%

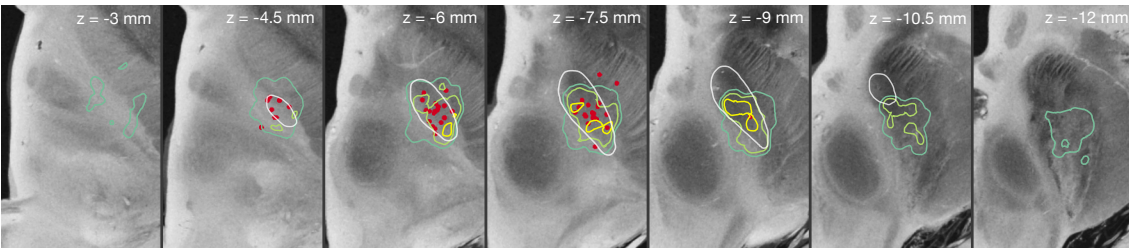

Supplement: supp [file elife-72929-supp-v1.zip › elife_poa_e72929_Figure_5_figure_supplement_3.pdf]
